# Supplementary material for: Identification of the mRNA targets of tRNA-specific regulation using genome-wide simulation of translation
Source: PubMed Central journal article supplement (PMC5100601; doi:10.1093/nar/gkw630), 2016-07-12

**Figure S2:** Simulated translation of all yeast mRNAs in wild-type tRNA concentrations, and with the concentration of each of the yeast tRNA types depleted by 75% in turn. This approach yielded 41 sets of transcriptome-wide simulations.

Each graph illustrates a scatter plot of the translation rate  $J$  of each mRNA in the two conditions, derived using the stochastic model of translation as described (Materials and Methods). Where the points lie along the  $x=y$  axis, translation of those mRNAs is unaffected by depletion of the tRNA named in that graph's title. Where points lie to the right of the  $x=y$  axis, the rate of translation  $J$  of that mRNA has been reduced in the tRNA depletion condition, when compared to translation in a wild-type tRNA milieu.

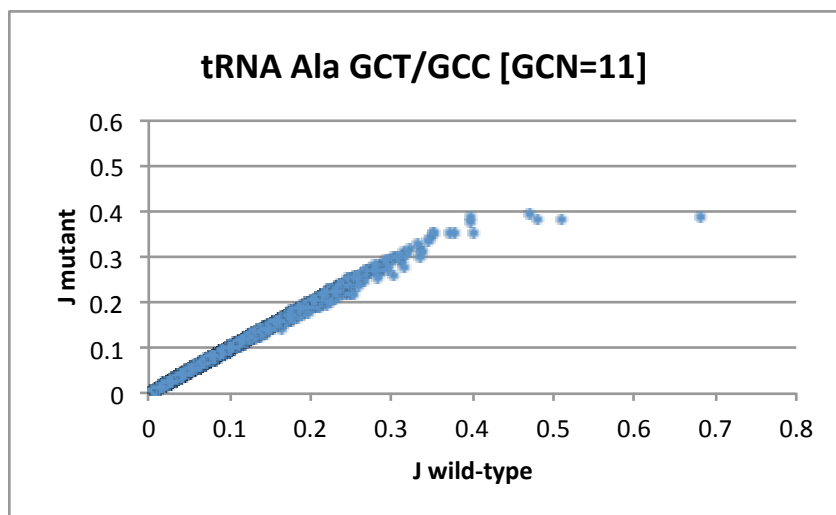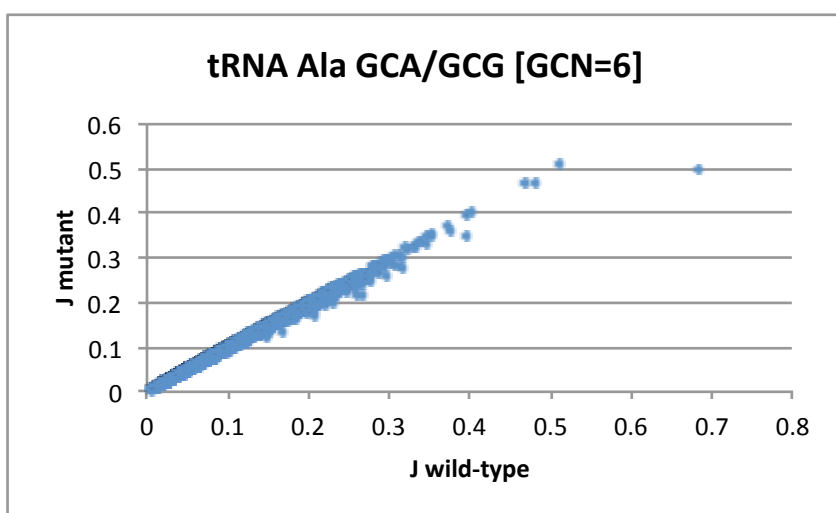

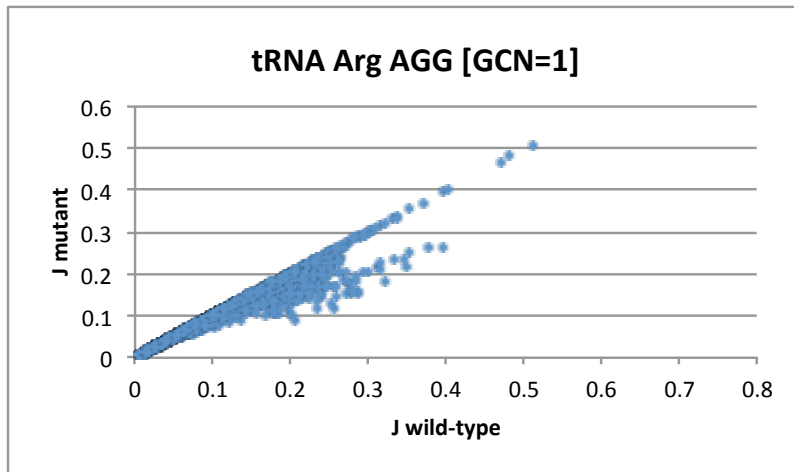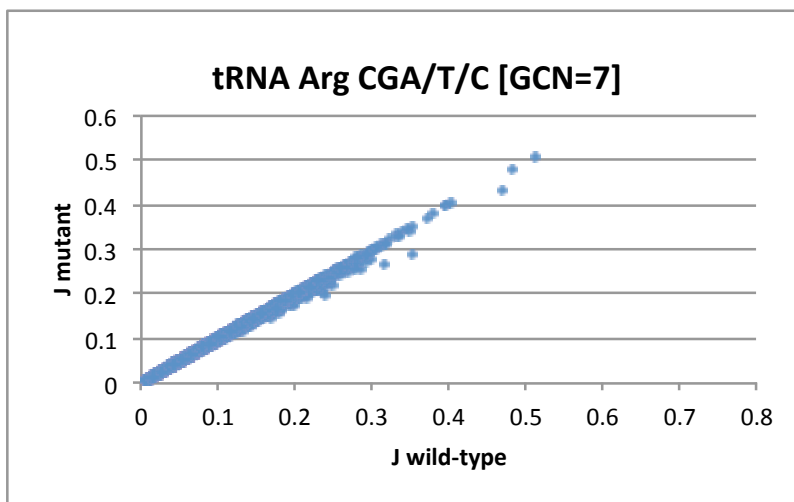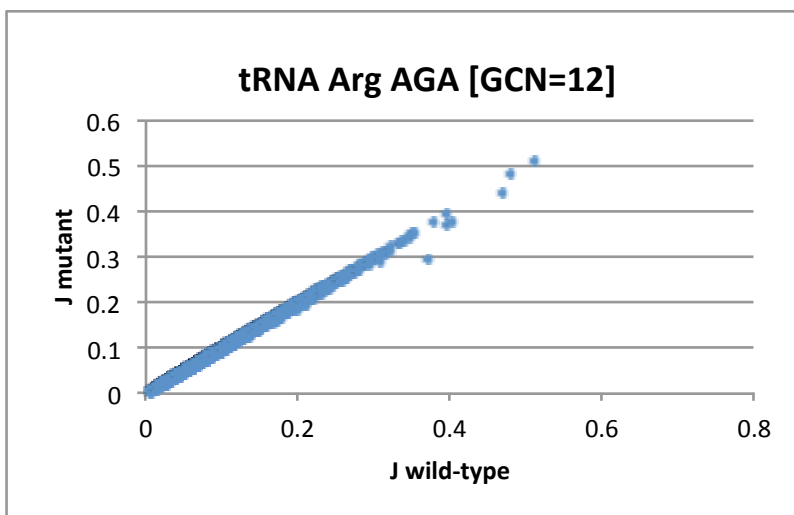

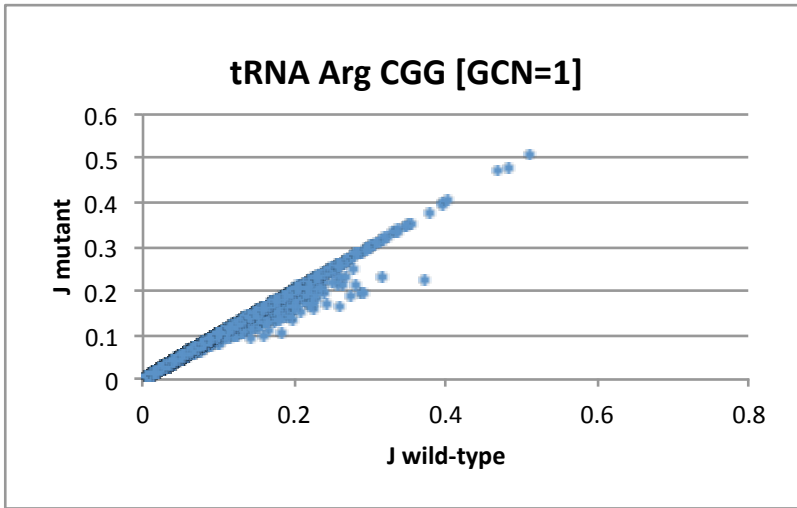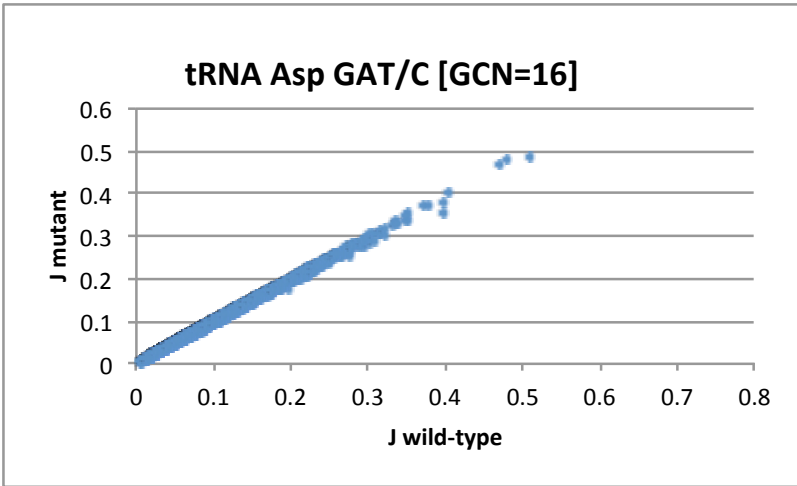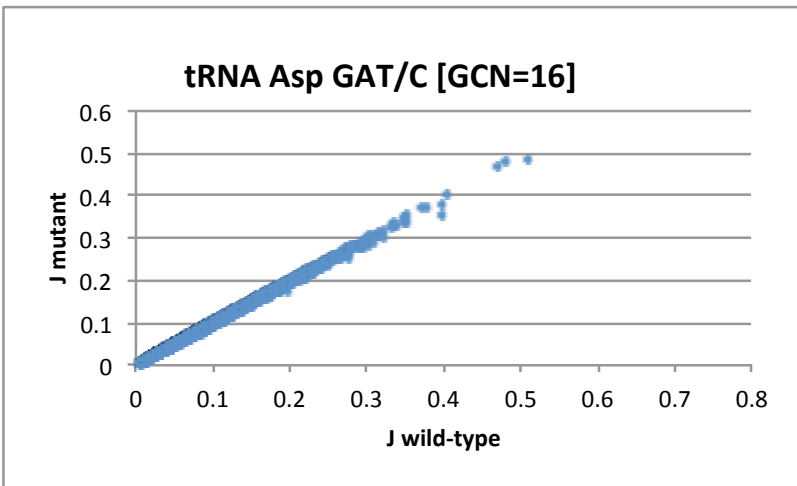

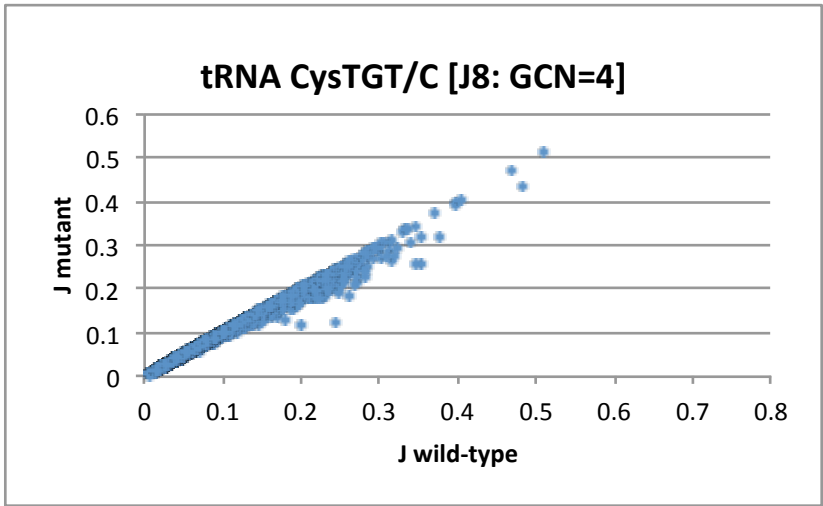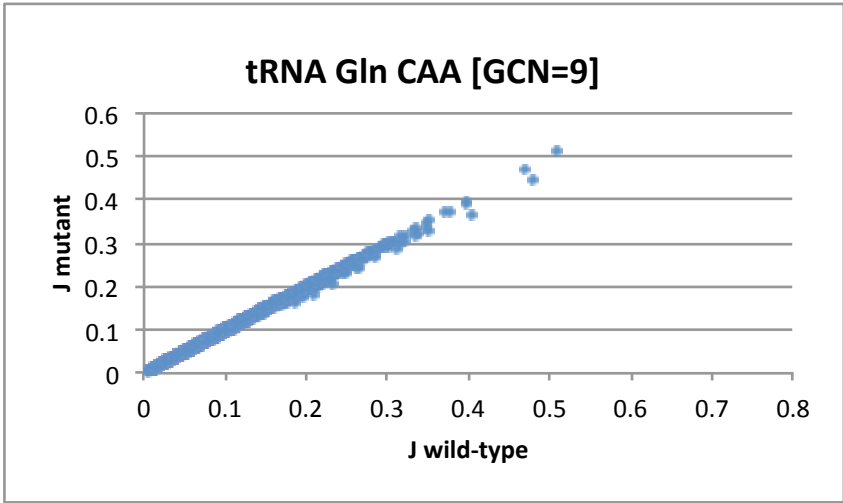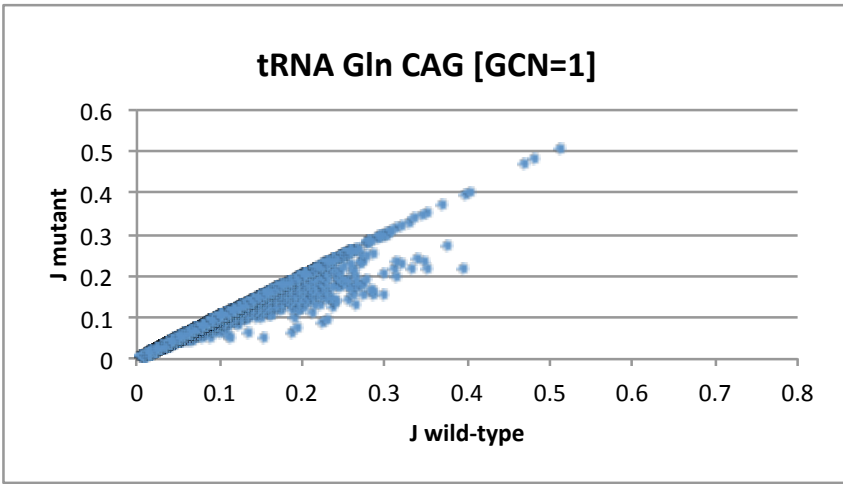

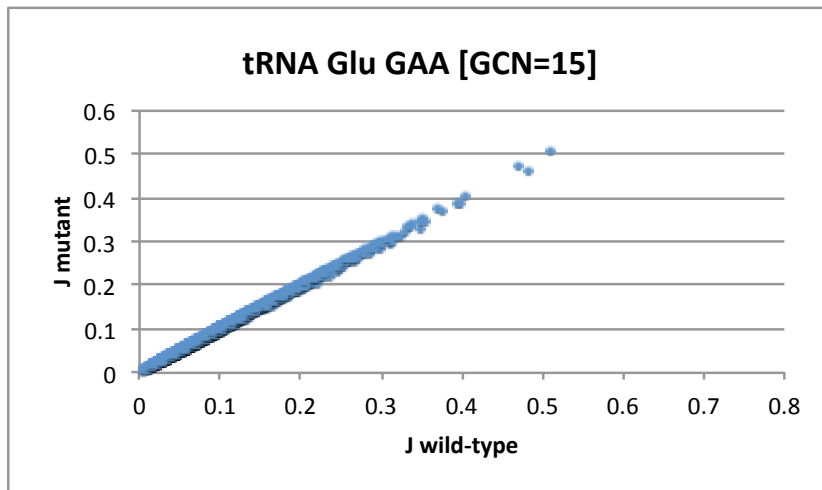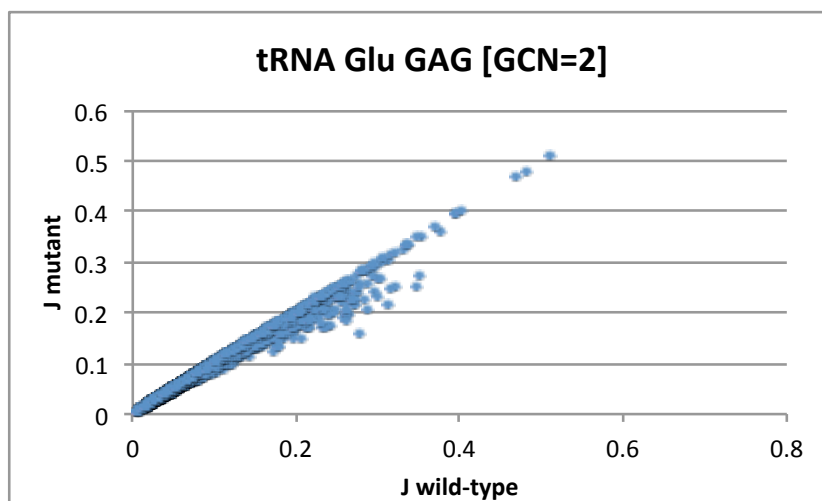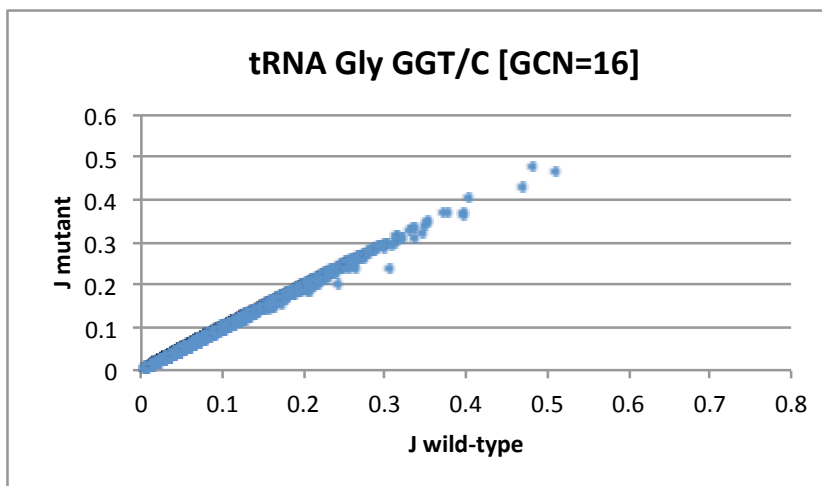

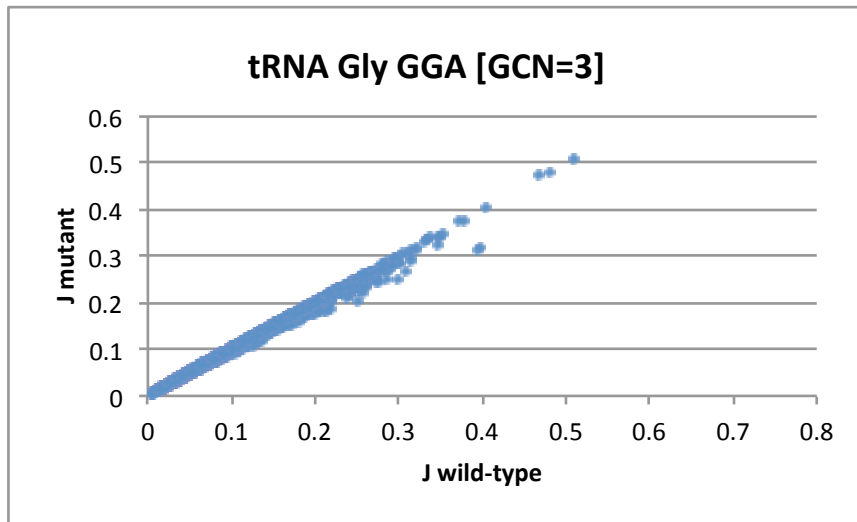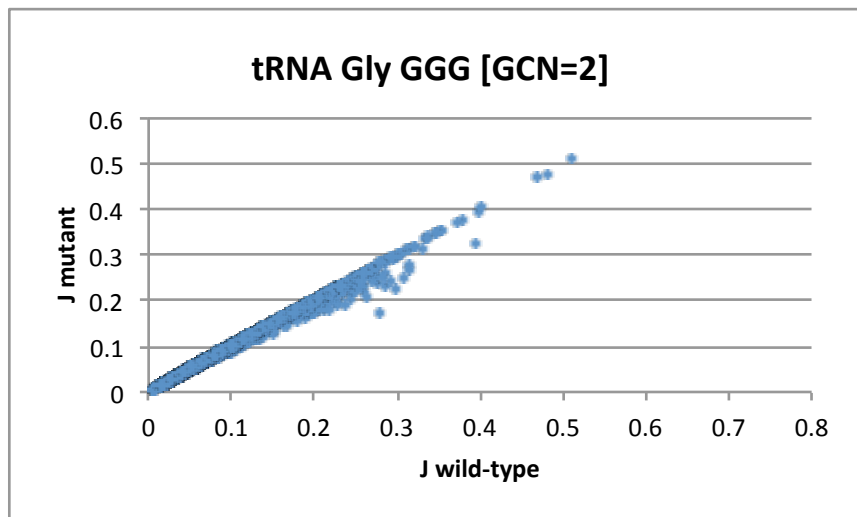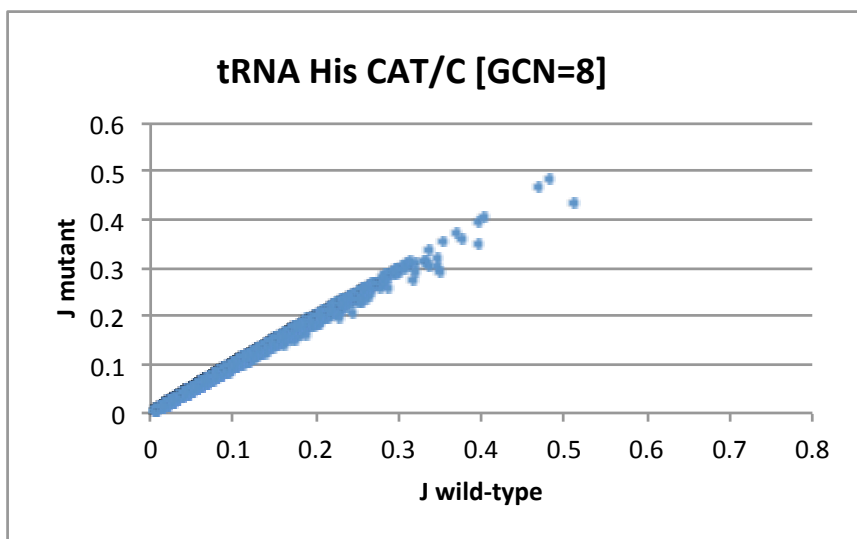

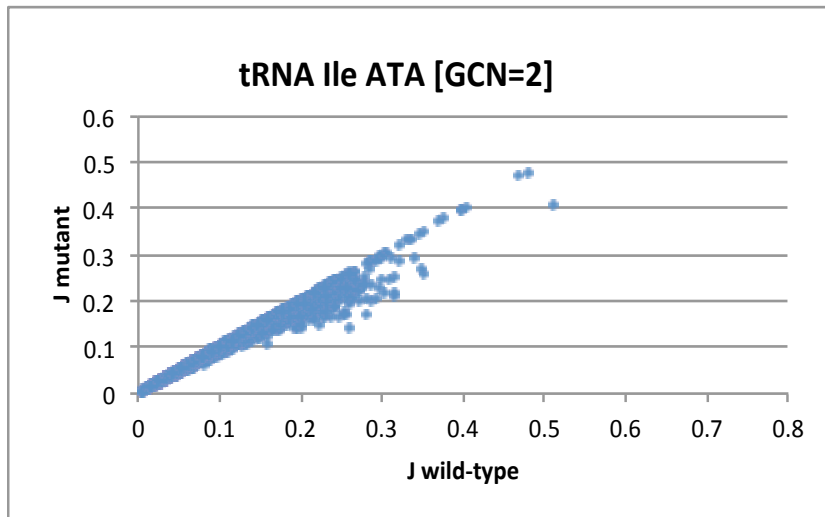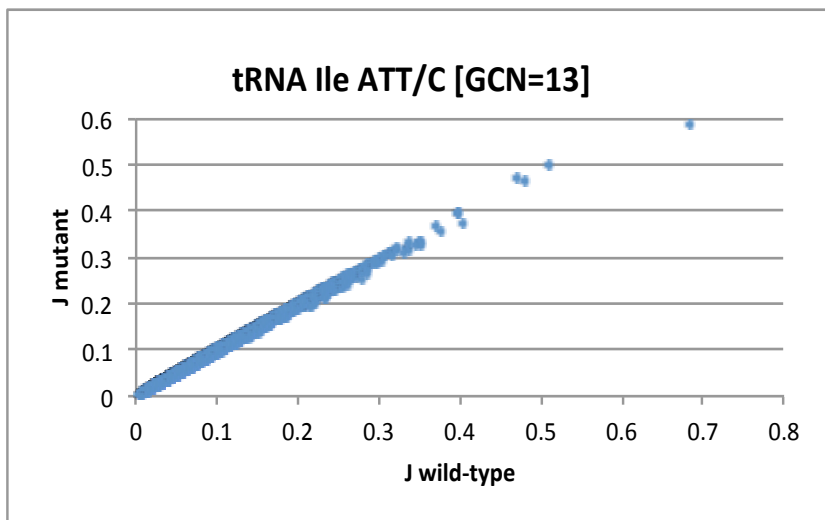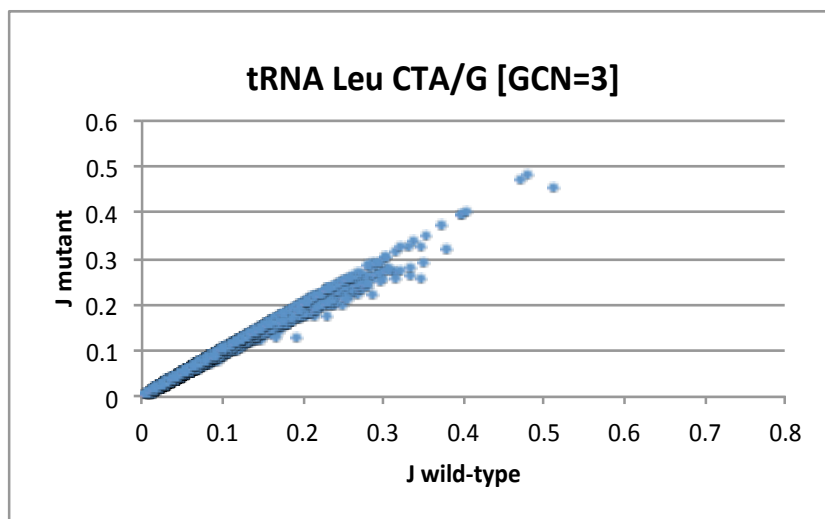

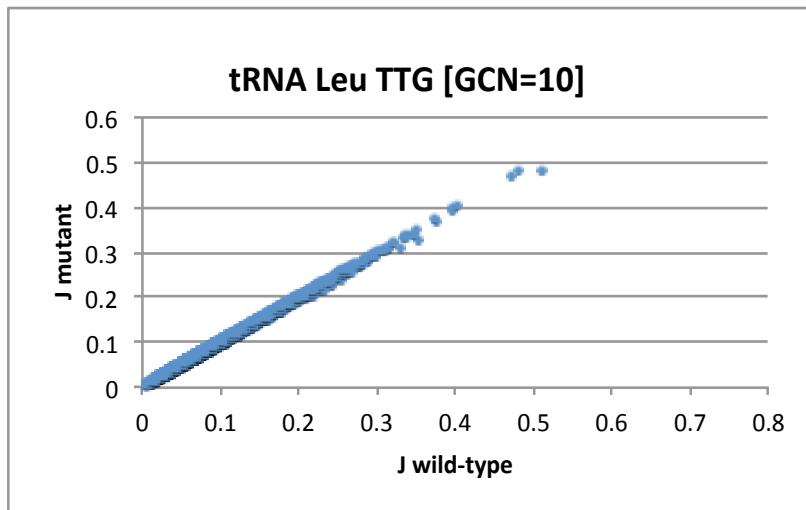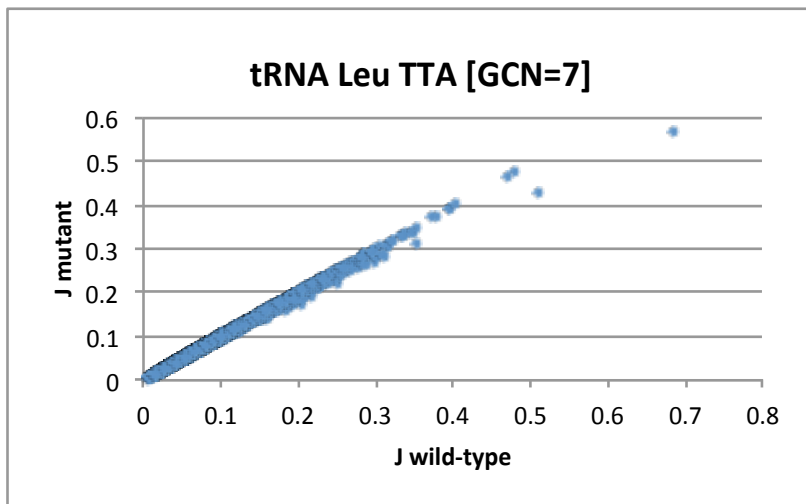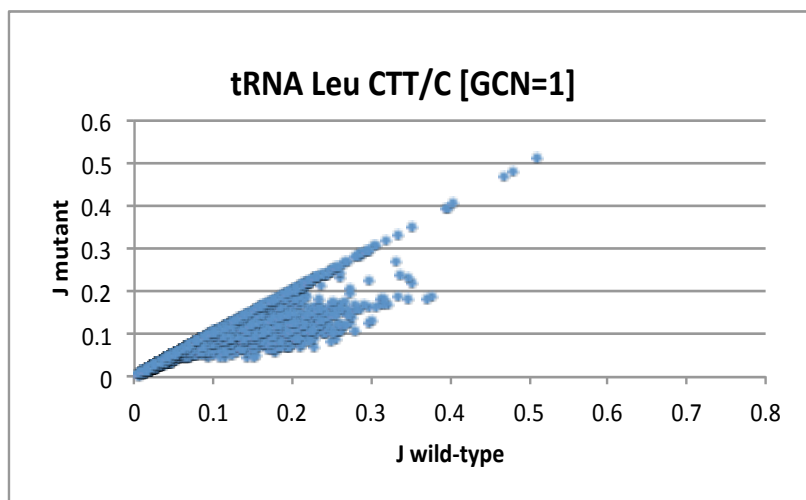



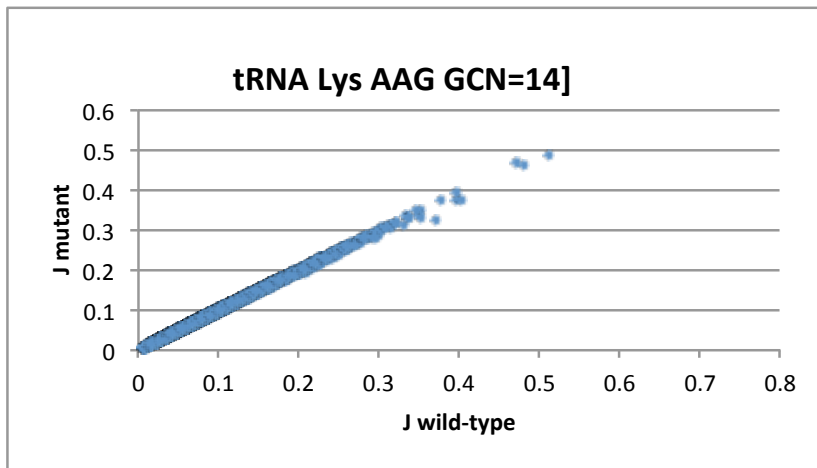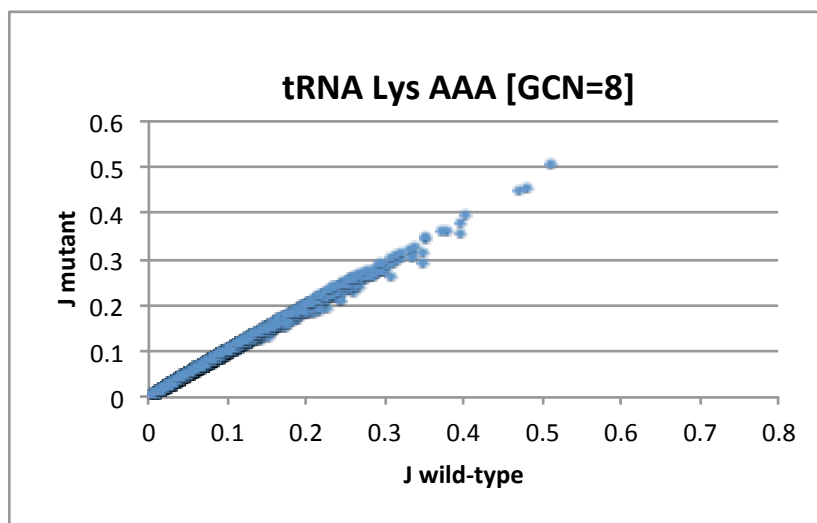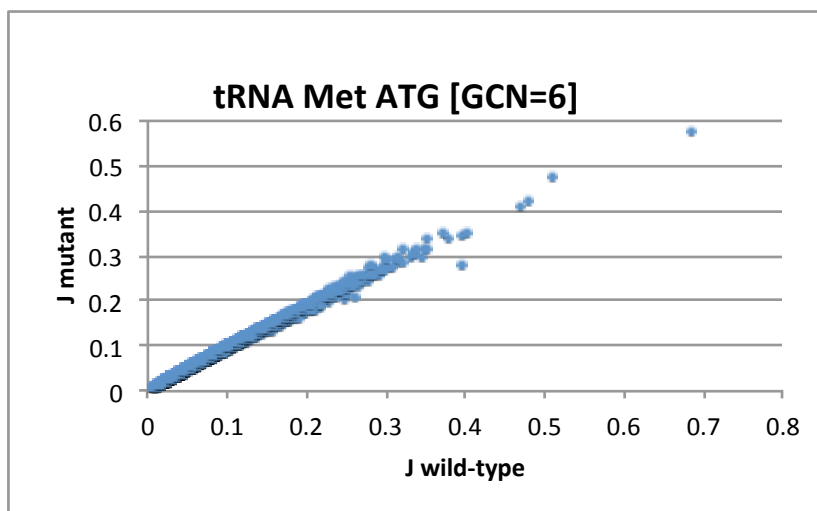

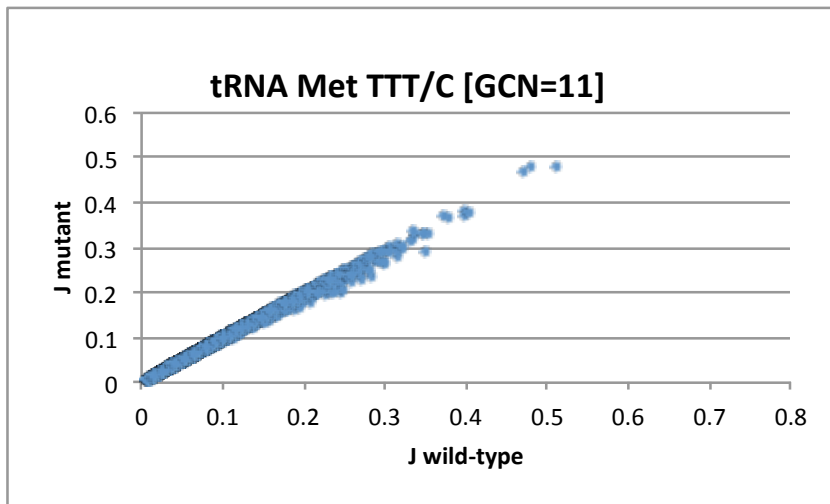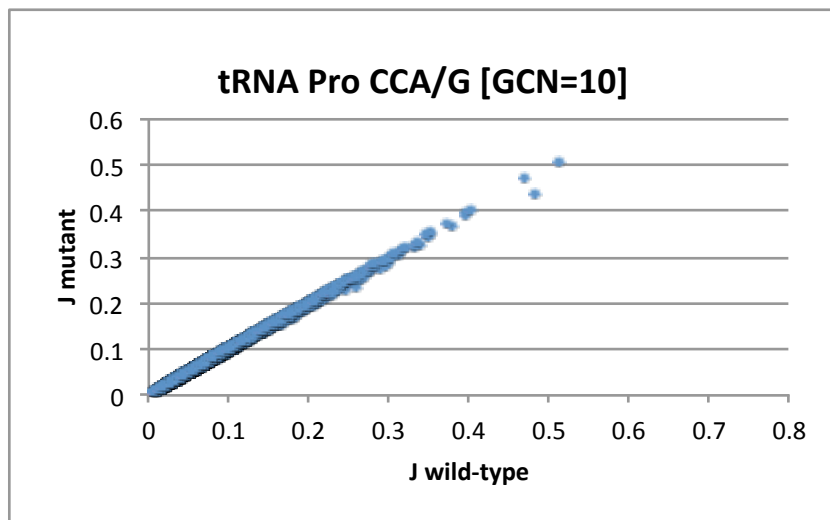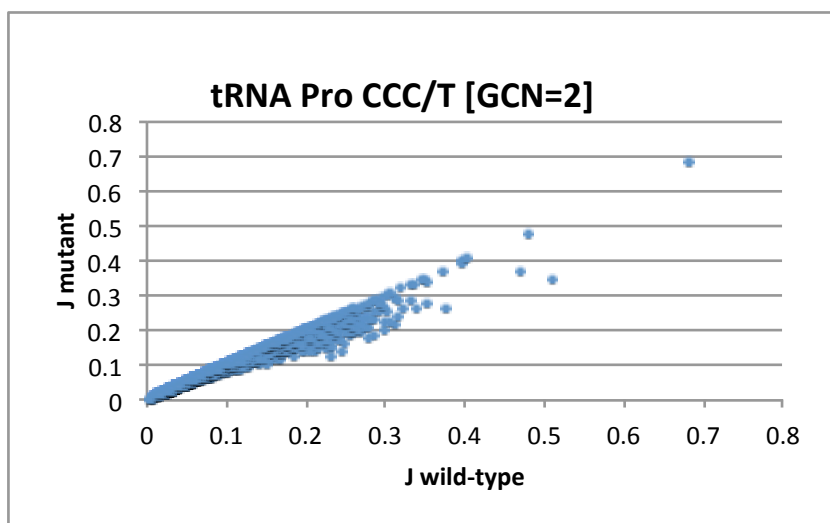

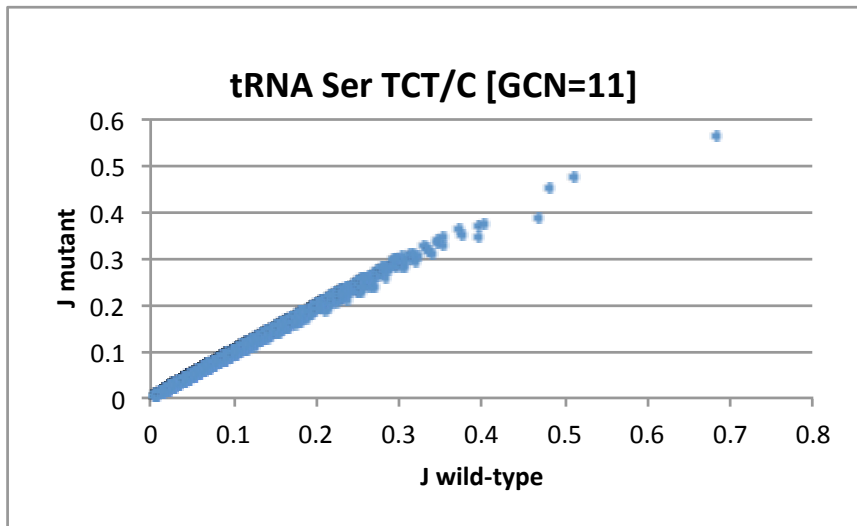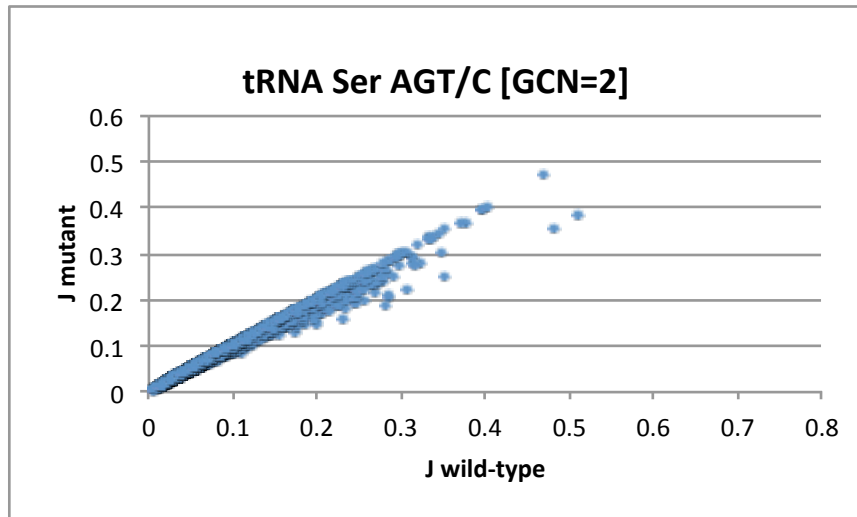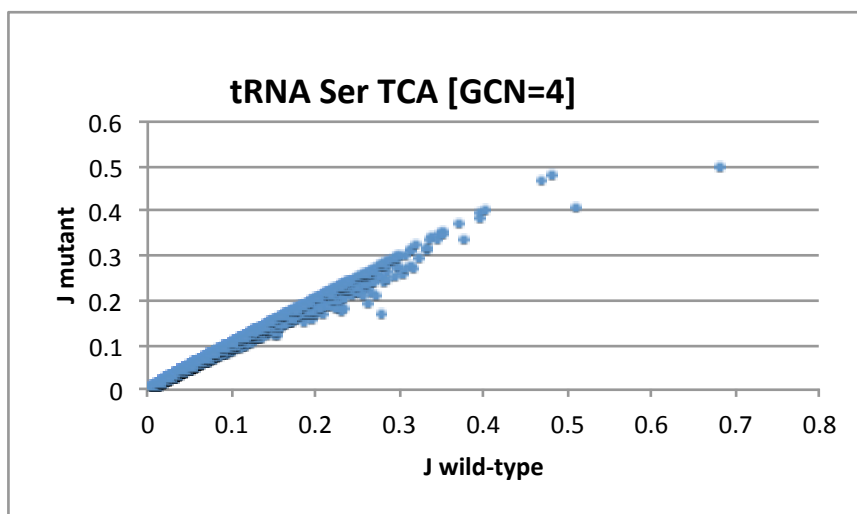

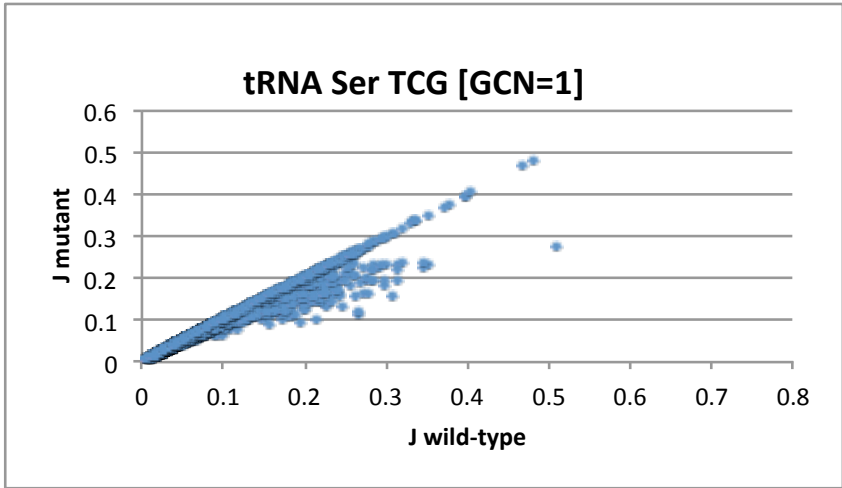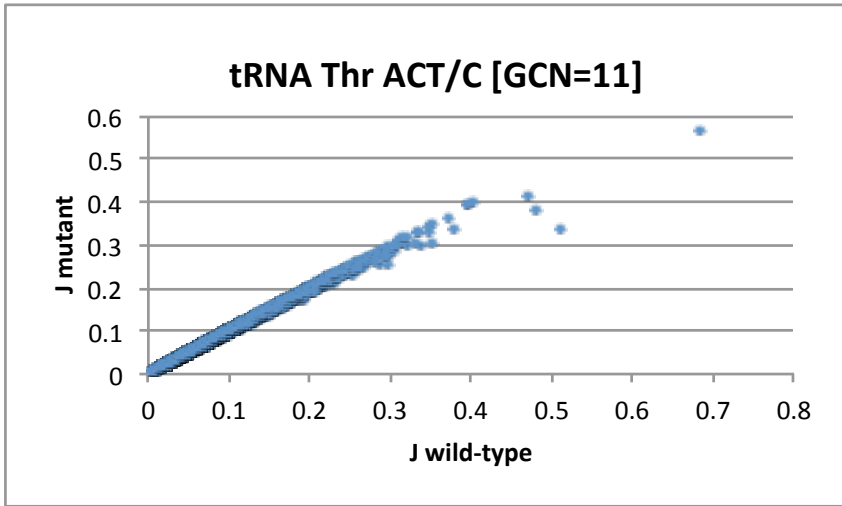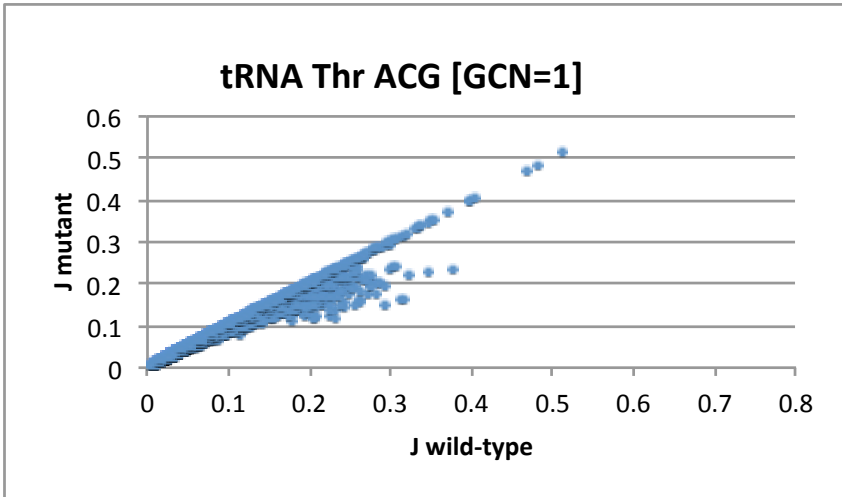

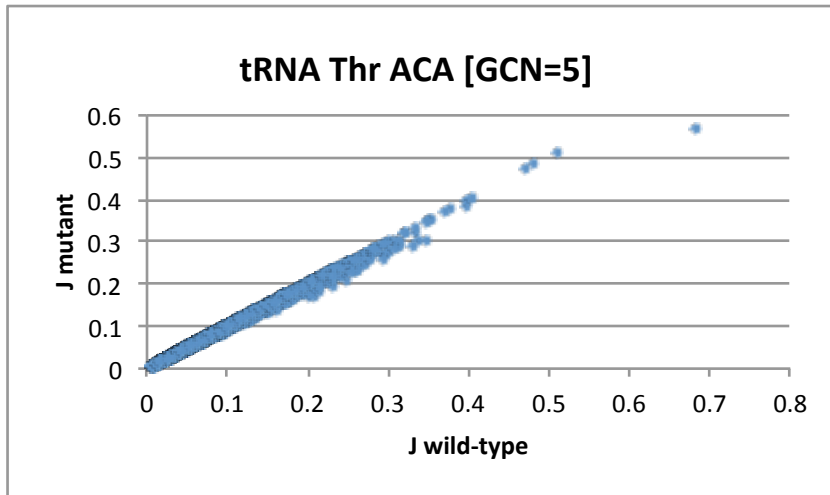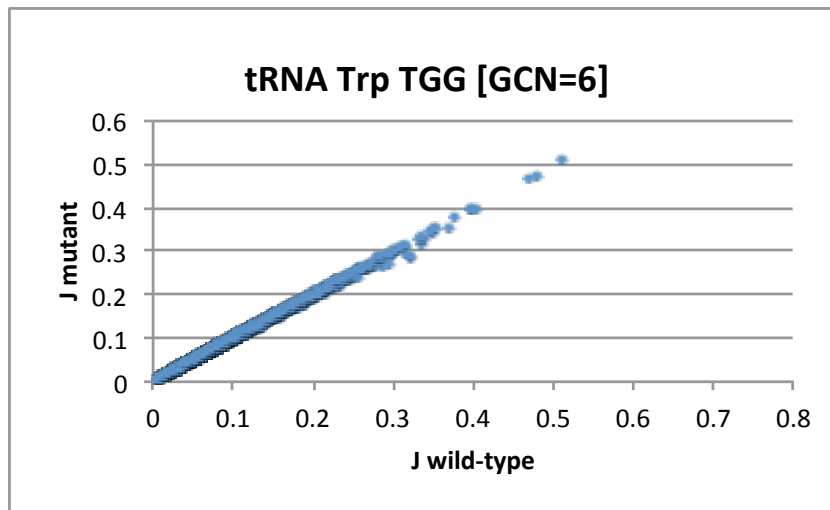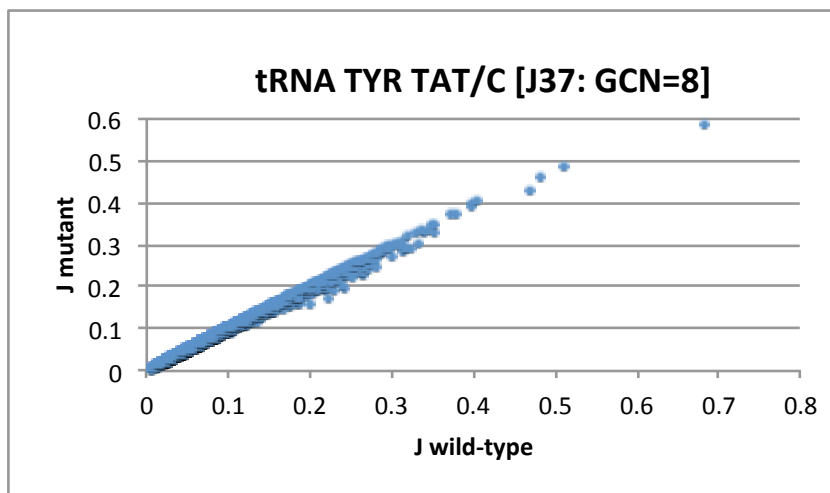

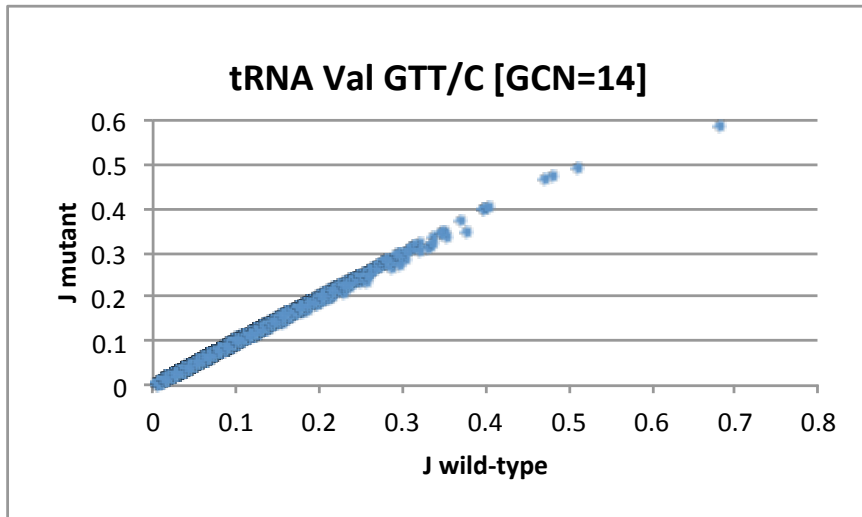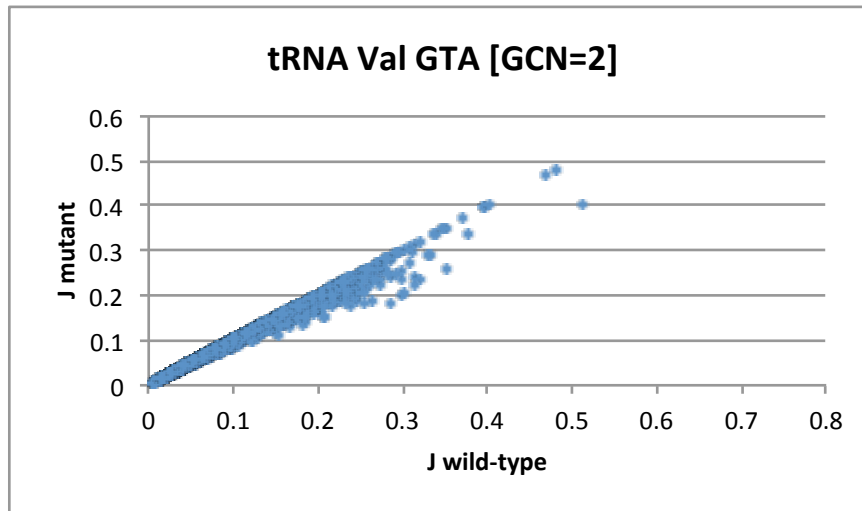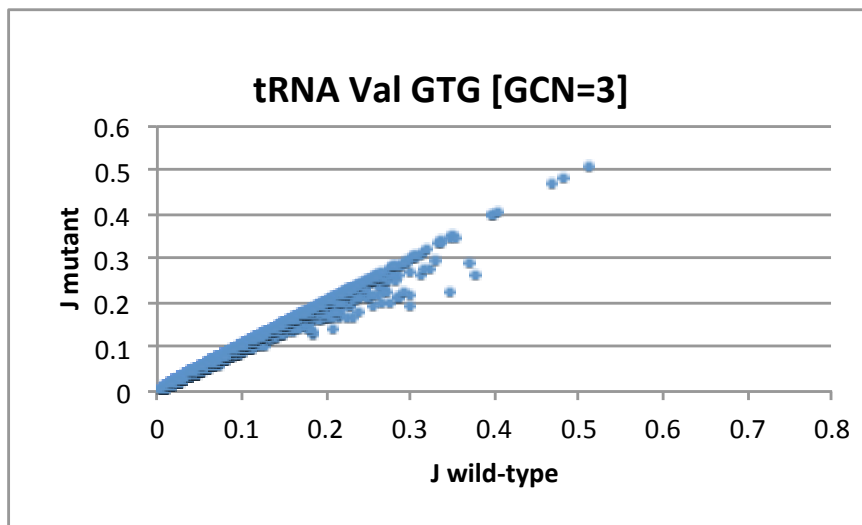

Supplement: supp_gkw630_nar-01103-n-2016-File010.pdf [file supp_gkw630_nar-01103-n-2016-File010.pdf]
